# Supplementary material for: High uptake of menstrual health information, products and analgesics within an integrated sexual reproductive health service for young people in Zimbabwe
Source: PubMed Central journal article supplement (PMC11036648; doi:10.1186/s12978-024-01789-y), 2024-04-22
Supplement: 12978_2024_1789_MOESM1_ESM.pdf [file 12978_2024_1789_MOESM1_ESM.pdf]

Table 1. Recorded incidences of MH product stock-outs

|           | 2019    |         |         | 2020    |         |         |         | 2021    |         |         |           |           |       |
|-----------|---------|---------|---------|---------|---------|---------|---------|---------|---------|---------|-----------|-----------|-------|
|           | Apr-Jun | Jul-Sep | Oct-Dec | Jan-Mar | Apr-Jun | Jul-Sep | Oct-Dec | Jan-Mar | Apr-Jun | Jul-Sep | Oct - Dec | Jan - Mar | TOTAL |
| HARARE    | 56      | 138     | 0       | 0       | 28      | 289     | 83      | 2       | 1       | 65      | -         | -         | 662   |
| BULAWAYO  | -       | 58      | 13      | 258     | 165     | 355     | 236     | 0       | 1       | 65      | 13        | -         | 1164  |
| MASH EAST | -       | 0       | 0       | 0       | 0       | 277     | 312     | 2       | 2       | 48      | 0         | -         | 646   |
